# Supplementary material for: Rapid and simple preparation of thiol–ene emulsion-templated monoliths and their application as enzymatic microreactors
Source: Royal Society of Chemistry journal article supplement (doi:10.1039/c5lc00224a), 2015-01-01
Supplement: c5lc00224a1.pdf [file c5lc00224a1.pdf]

## Supplementary information

### Performance of the galactose oxidase microreactors

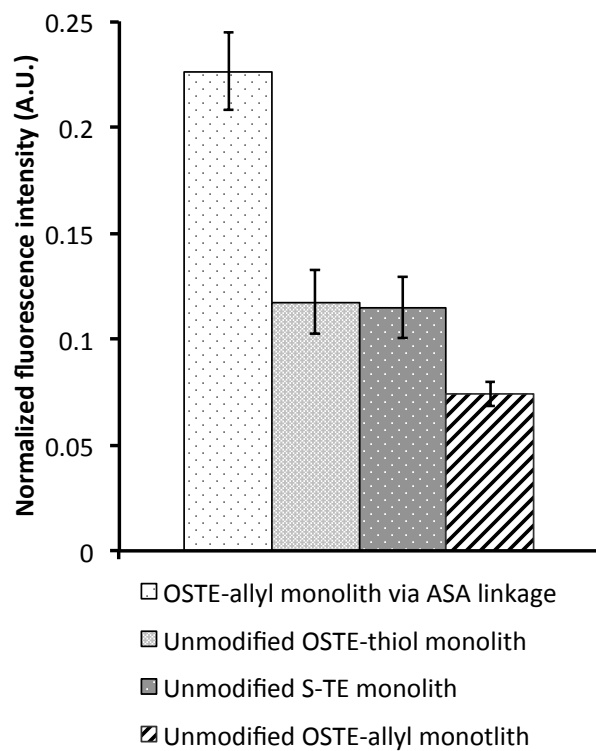

**Figure S 1.** Galactose oxidase microreactors performance.

## Thiol surface density

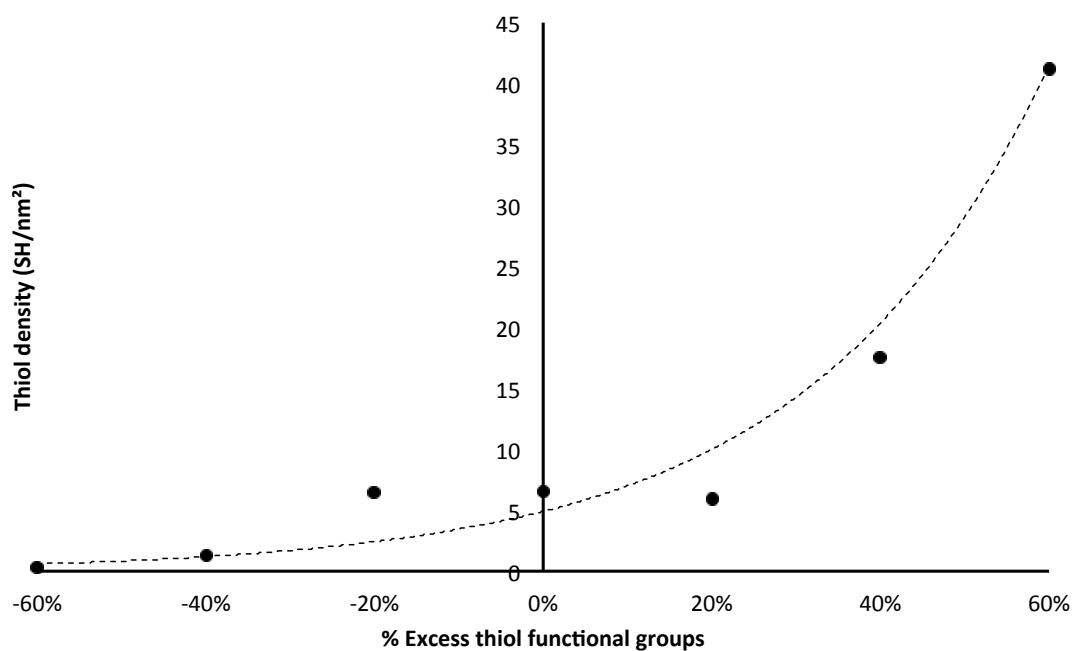

**Figure S 2.** Surface density of free thiol groups on TE substrates as a function of stoichiometric composition. Negative values indicate substrates that were prepared with an excess of “ene” functional groups in the monomeric mix.

## Storage stability

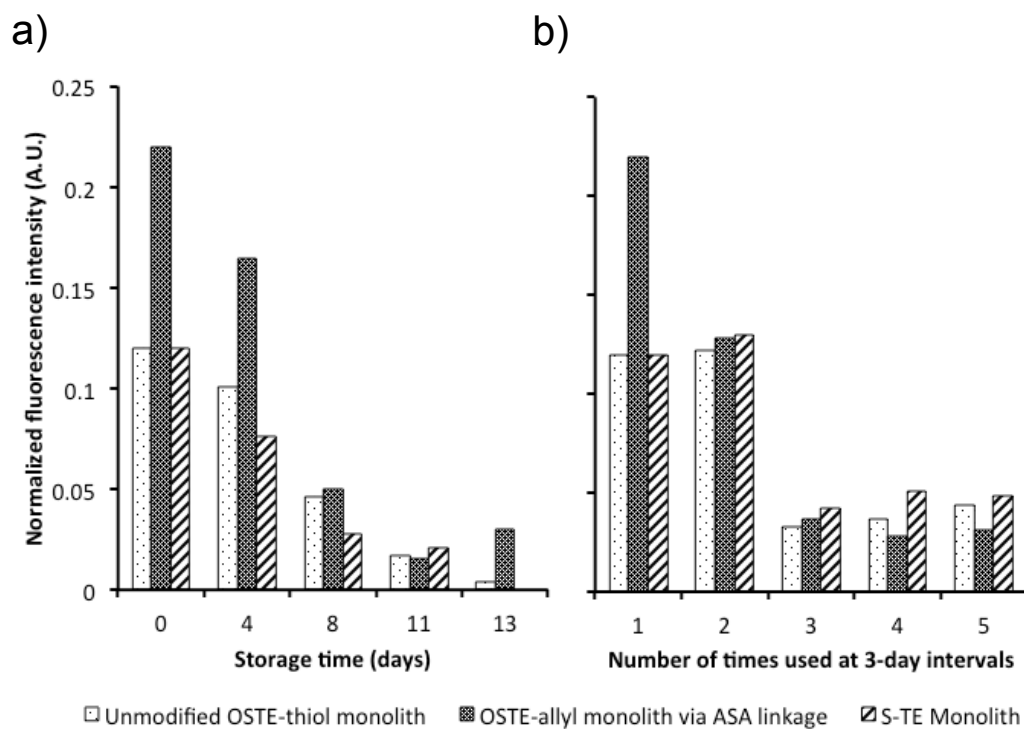

**Figure S 3.** Storage stability of the galactose oxidase microreactors. (Left) Unused chips were stored and used at 3-day intervals. (Right) The same chip was stored and re-used at 3-day intervals.
